# Supplementary material
Source: publisher site journal article supplement (https://www.kjim.org/upload/media/kjim-2018-378-suppl.pdf)
Supplement: Supplementary file 1 [file kjim-2018-378-suppl.pdf]

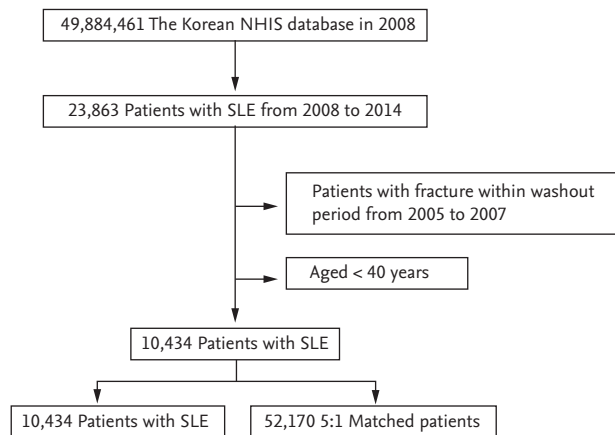

**Supplementary Figure 1.** Flow chart of the study. NHIS, National Health Insurance Service; SLE, systemic lupus erythematosus.
